# Supplementary material for: Organic–inorganic hybrid ferrocene/AC as cathodes for wide temperature range aqueous Zn-ion supercapacitors
Source: Royal Society of Chemistry journal article supplement (doi:10.1039/d2ra02907c), 2022-01-01
Supplement: d2ra02907c1.pdf [file d2ra02907c1.pdf]

# **Organic-inorganic hybrid ferrocene/AC as cathodes for wide temperature range aqueous Zn-ion supercapacitors**

Shuangyu Li,<sup>a</sup> Shu Zhang,<sup>\*ab</sup> Tingting Feng,<sup>ab</sup> Haiping Zhou,<sup>ab</sup> and Mengqiang Wu<sup>\*ab</sup>

<sup>a</sup>School of Materials and Energy, University of Electronic Science and Technology of  
China, 2006 Xiyuan Avenue, West High-Tech Zone, Chengdu 611731, China

<sup>b</sup>The Yangtze Delta Region Institute (Huzhou), University of Electronic Science and  
Technology of China, Huzhou 313001, China

## **Corresponding Authors**

\*Email: shuzhang@uestc.edu.cn (S.Z.)

\*Email: mwu@uestc.edu.cn (M.W.)

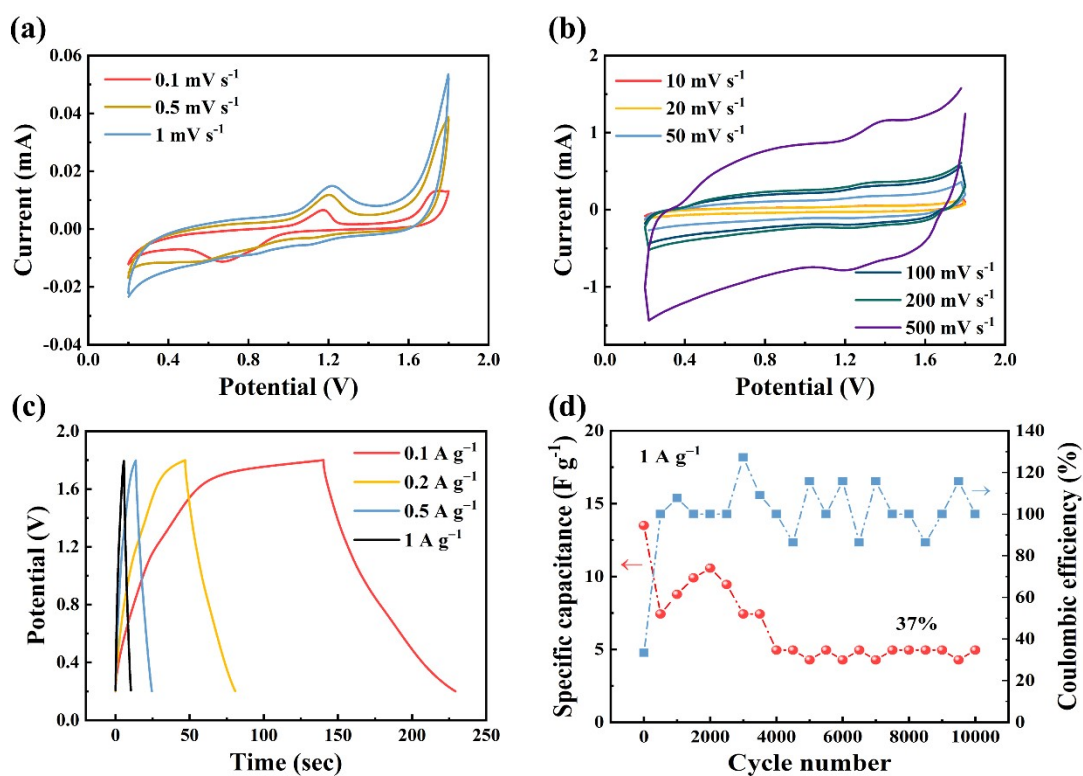

**Fig. S1** Electrochemical behaviors of ZHSCs using ferrocene cathode (a) CV curves of low scan rates ( $0.1\text{--}1\text{ mV s}^{-1}$ ); (b) CV curves of high scan rates ( $10\text{--}500\text{ mV s}^{-1}$ ); (c) GCD profiles; (d) Long-term cycling at  $1\text{ A g}^{-1}$ .

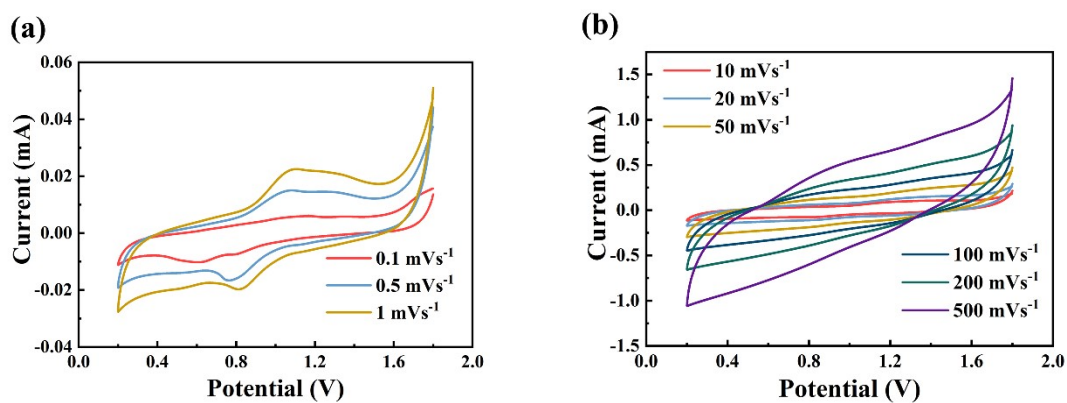

**Fig. S2** CV curves of ZHSCs using ferrocene cathode in  $1\text{ M ZnSO}_4$  (a)  $0.1\text{--}1\text{ mV s}^{-1}$ ; (b)  $10\text{--}500\text{ mV s}^{-1}$ .

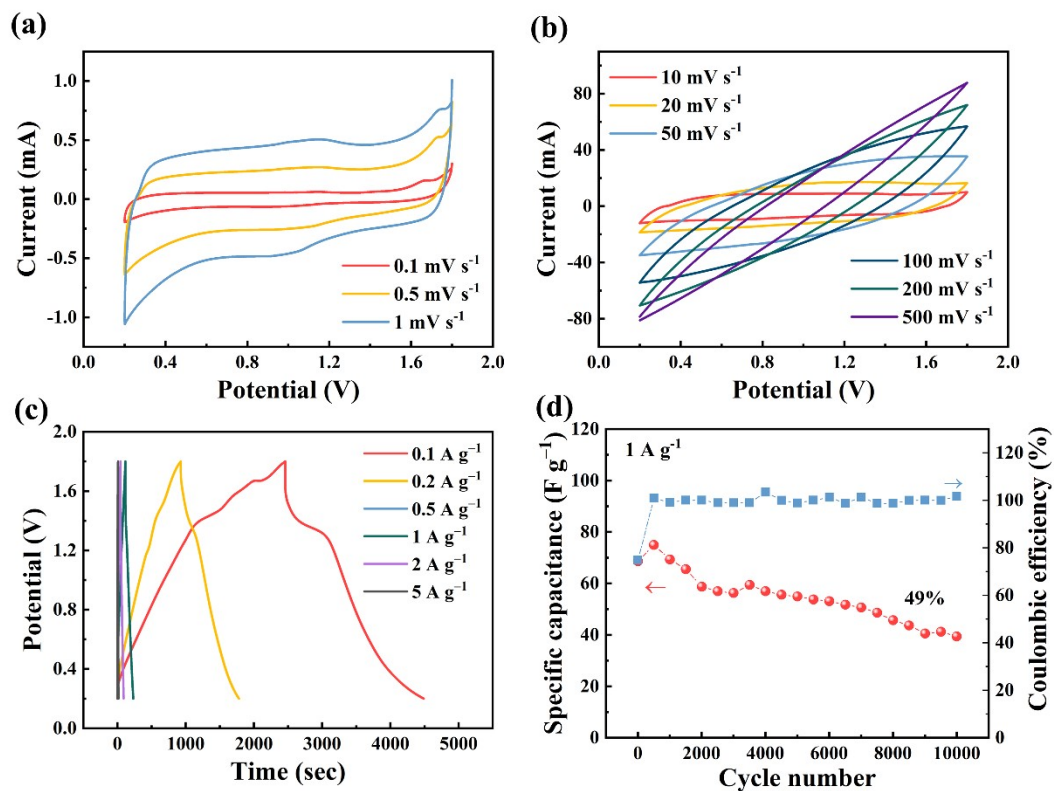

**Fig. S3** Electrochemical behaviors of ZHSCs using AC cathode (a) CV curves of low scan rates ( $0.1\text{--}1\text{ mV s}^{-1}$ ); (b) CV curves of high scan rates ( $10\text{--}500\text{ mV s}^{-1}$ ); (c) GCD profiles; (d) Long-term cycling at  $1\text{ A g}^{-1}$ .

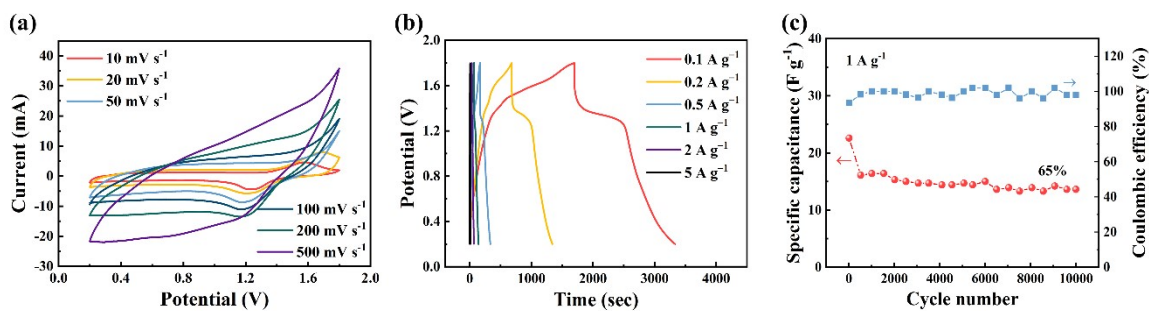

**Fig. S4** Electrochemical behaviors of ZHSCs using hybrid cathode (ferrocene and AC in a mass ratio of 3:1) (a) CV curves; (b) GCD profiles; (c) Long-term cycling at 1 A  $\text{g}^{-1}$ .

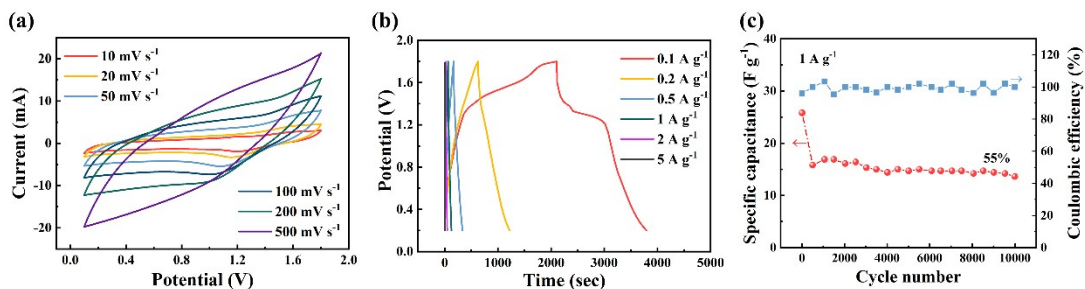

**Fig. S5** Electrochemical behaviors of ZHSCs using hybrid cathode (ferrocene and AC in a mass ratio of 5:1) (a) CV curves; (b) GCD profiles; (c) Long-term cycling at 1 A  $\text{g}^{-1}$ .

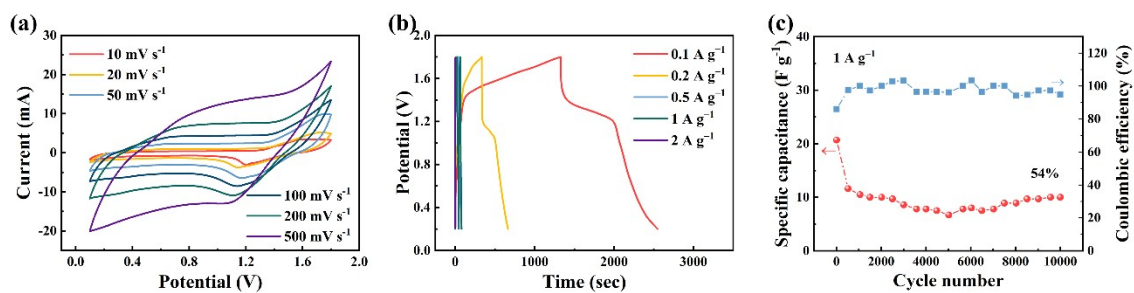

**Fig. S6** Electrochemical behaviors of ZHSCs using hybrid cathode (ferrocene and AC in a mass ratio of 7:1) (a) CV curves; (b) GCD profiles; (c) Long-term cycling at 1 A  $\text{g}^{-1}$ .

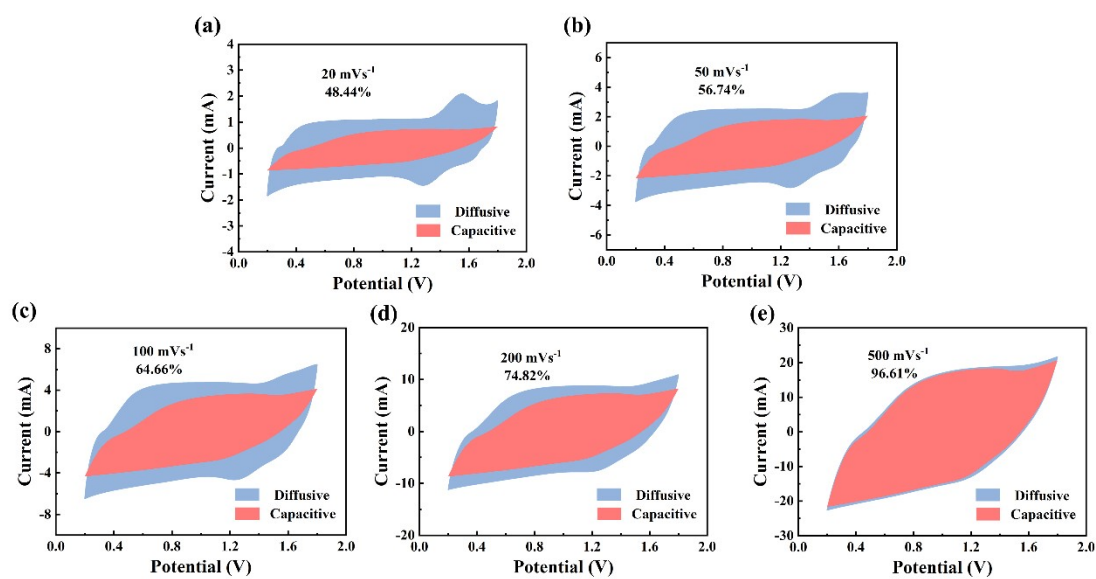

**Fig. S7** Capacitive contribution to the total current from CV analysis at different scan rates (the red region).

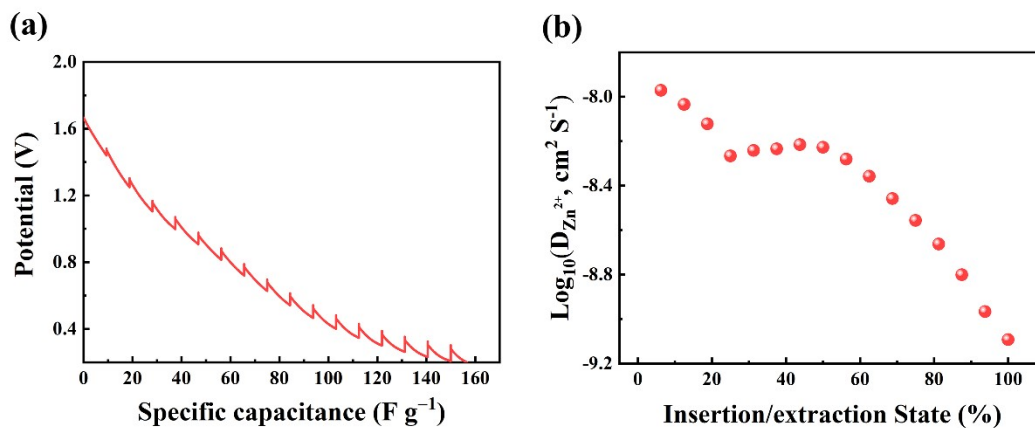

**Fig. S8** (a) Discharge curve in GITT measurements of ZHSCs using AC cathode; (f) The corresponding Zn<sup>2+</sup> diffusion coefficient during the discharge process.

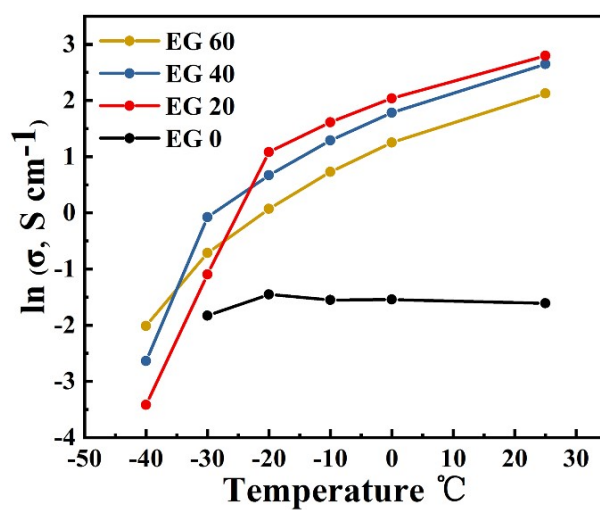

**Fig. S9** The ionic conductivities of EG0, EG20, EG40 and EG60.

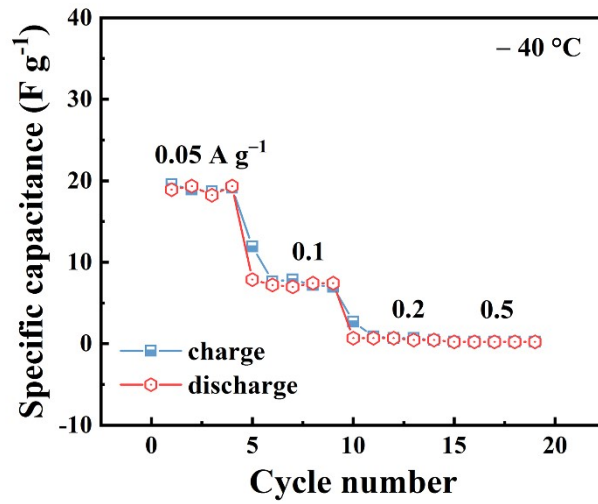

Fig. S10 Rate performance of ZHSCs using ferrocene/AC cathode at -40 °C.

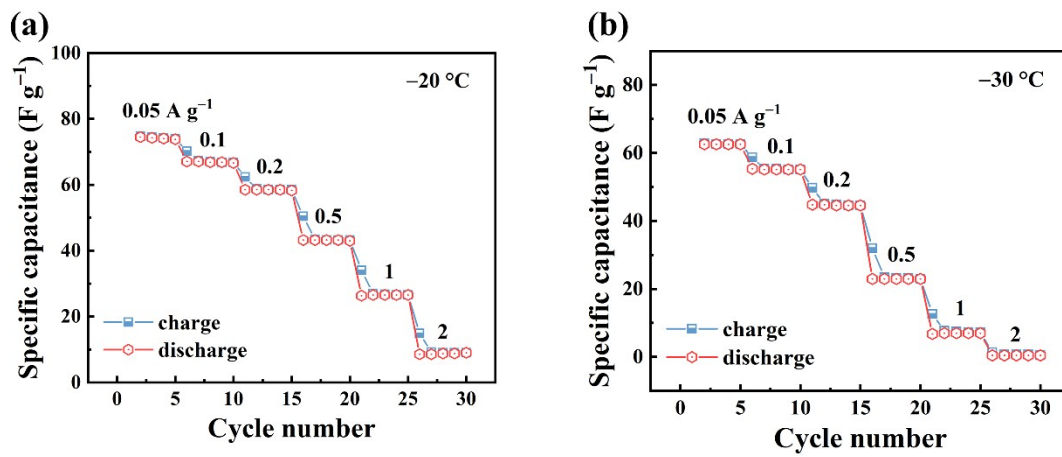

Fig. S11 Rate performance of ZHSCs using AC cathode at -20 °C and -30 °C.

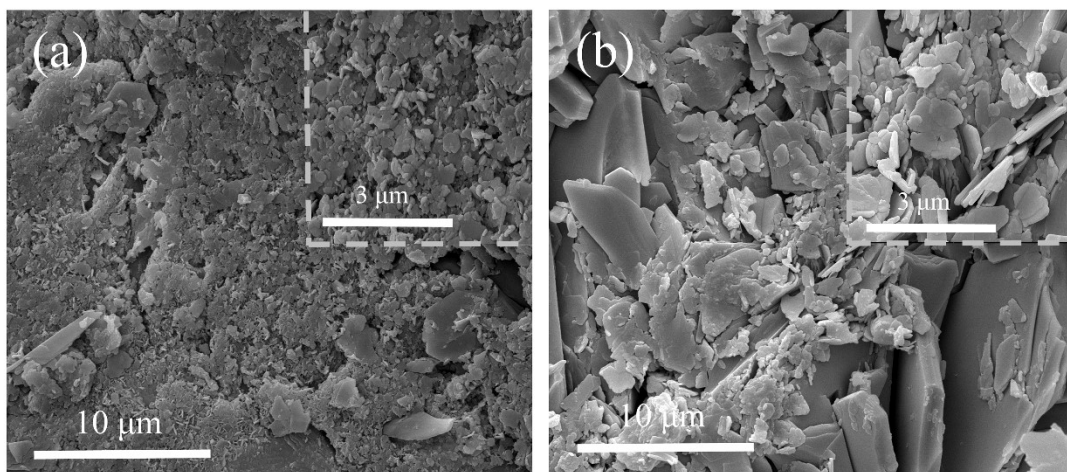

**Fig. S12** SEM images after cycling (a) Zn anode in Zn // AC SCs; (b) Zn anode in Zn // ferrocene/AC SCs.

**Table S1** The specific surface area, total pore volume for adsorption, total pore volume of micropores of the three samples.

| Sample       | Specific surface area<br>( $\text{m}^2 \text{g}^{-1}$ ) | Total pore volume for<br>adsorption ( $\text{cm}^3 \text{g}^{-1}$ ) | Total pore volume of<br>micropores ( $\text{cm}^3 \text{g}^{-1}$ ) |
|--------------|---------------------------------------------------------|---------------------------------------------------------------------|--------------------------------------------------------------------|
| ferrocene    | 4.859                                                   | 0.031                                                               | 0.001                                                              |
| AC           | 2458.658                                                | 1.361                                                               | 0.982                                                              |
| ferrocene/AC | 961.601                                                 | 0.620                                                               | 0.343                                                              |
